# Supplementary material
Source: publisher figshare collection journal article supplement (https://gsajournals.figshare.com/ndownloader/files/28005747)
Supplement: Supplementary file 1 [file 28005747]

**
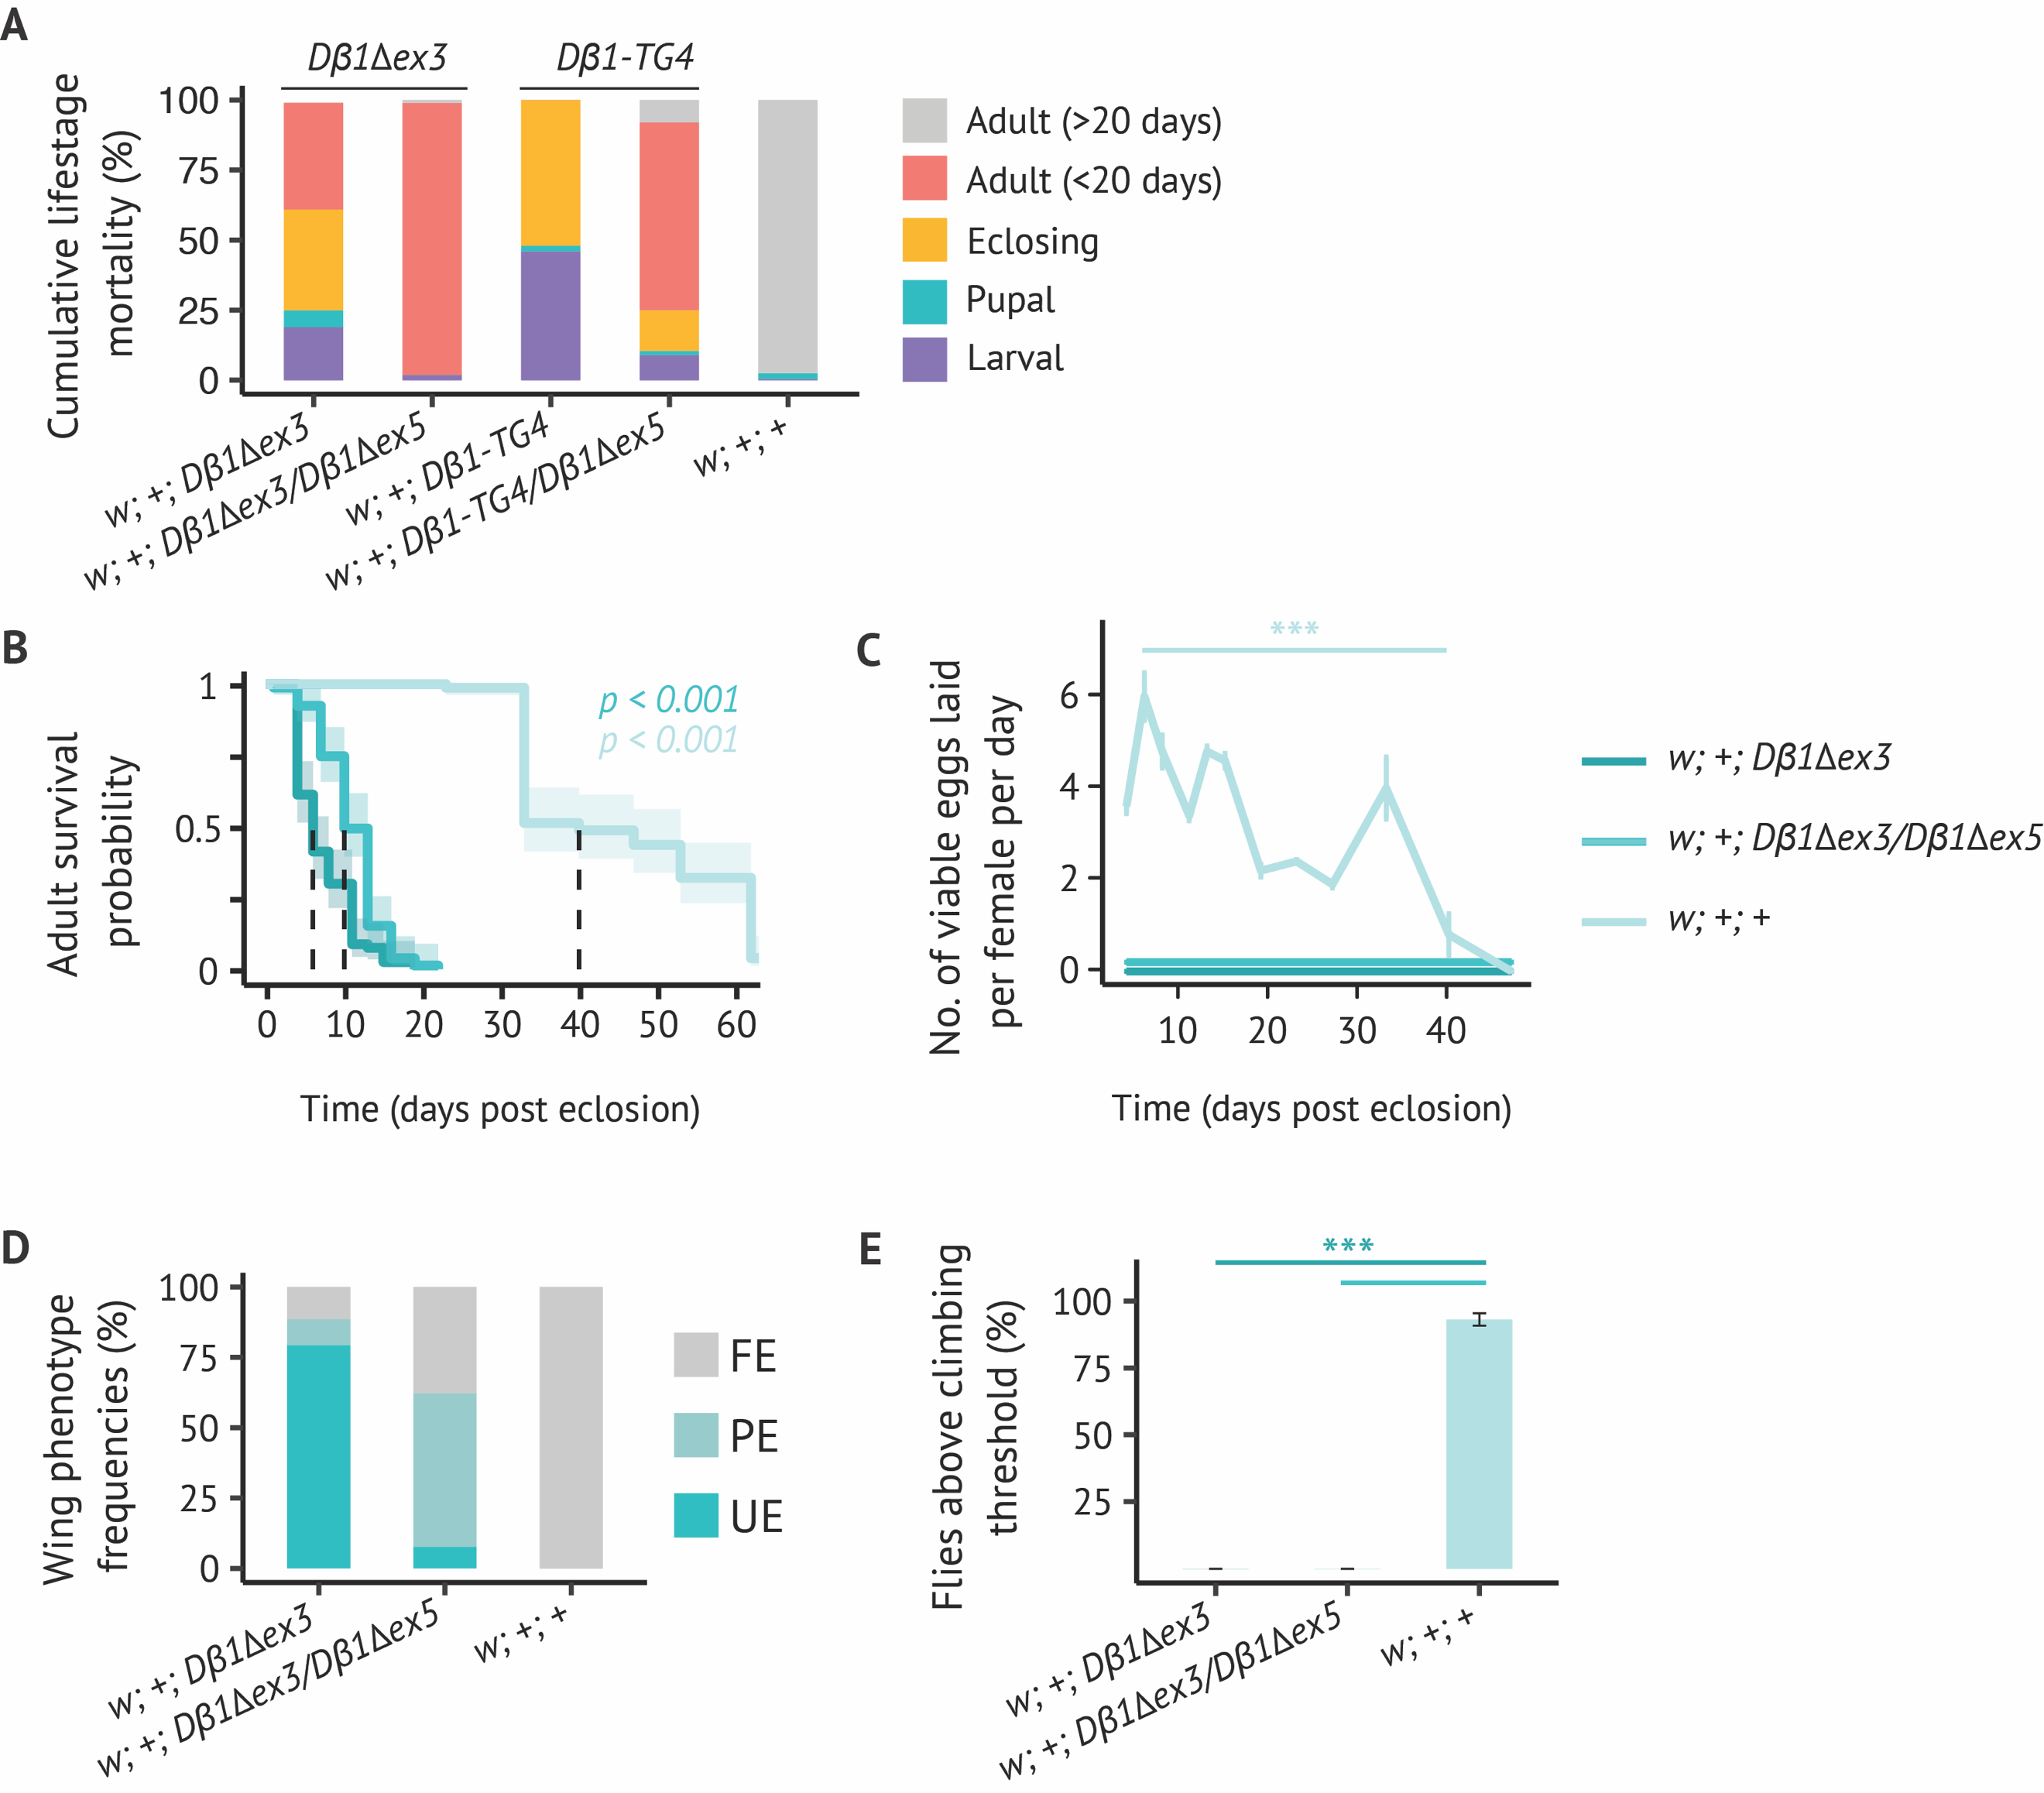
**

**Figure S6** **Fitness effects for the smaller deletion, *Dβ1Δex3*, and *Dβ1*-TG4**

*Dβ1Δex3* (a deletion) and *Dβ1-*TG4 (a T2A-GAL4 insertion) were examined in homozygosis and in transheterozygosis with *Dβ1Δex5*. The background control strain is wAC9 (*w; +; +*). (A) Developmental mortality was common in homozygotes, most notably for *Dβ1-*TG4 where 0% survived to adulthood (*n =* 250). Since homozygous *Dβ1*-TG4 adults could not be collected, and transheterozygous *Dβ1*-TG4 adults are already presented in Figures 2 and 3, these genotypes are absent from (B-E). (B) Kaplan-Meier survival plots with black dashed lines marking median longevity. Longevity was significantly low in homozygotes and transheterozygotes relative to the wAC9 control. Shading represents 95% confidence intervals (*n* = 80,Cox-Mantel test). (C) Number of viable eggs laid per female per day, throughout lifespan. No egg laying was observed for homozygotes or transheterozygotes. Error bars indicate SEM (*n =* 40, *** *p* < 0.001, Student’s t-test performed for each time point). (D) Wing expansion was disrupted in most homozygotes and transheterozygotes (*n* = 250). UE, unexpanded; PE, partially expanded; FE, fully expanded. (E) Homozygotes and transheterozygotes failed all climbing assays. Error bars indicate SEM (*n =* 80, *p* *** < 0.001, Tukey’s HSD pair-wise test).
